# Supplementary material
Source: publisher figshare collection journal article supplement (https://sage.figshare.com/ndownloader/files/17868383)
Supplement: Supplementary file 1 [file 17868383]

Supplementary Table One: Current state of assisted dying legalisation in Australia and New Zealand .

| State | Legalized | Criteria proposed or in act. | Extension of criteria. |
| --- | --- | --- | --- |
| Northern Territory | Right of the Terminally Ill Act 1995,  Repealed Federal Government 1997 | a patient had to be over 18 and be mentally and physically competent to request their own death | Nil: repealed. |
| Tasmania | Voluntary Assisted Dying Bill  2013 Bill defeated, reintroduced twice and in 2017 defeated for 3rd time. | As per Northern Territory | Nil: defeated. |
| South Australia | Death with Dignity bill  2016. Bill defeated | Where a person is in unbearable pain and suffering from a terminal illness. | Nil: defeated. |
| Victoria | Legislation modelled on Australian Medical Association recommendations: the Voluntary Assisted Dying Act 2017. Eighteen month implementation period. | Must be diagnosed with a medical condition that is incurable; advanced, progressive and will cause death; is expected to cause death within 6 months; and is causing suffering to the person that cannot be relieved in a manner that the person considers tolerable.  Aged 18 or older, resident in Victoria for at least 12 months and has decision-making capacity in relation to voluntary assisted dying; | First case application of this act, after 18 month implementation period, July 2019. |
| New South Wales | Voluntary Assisted Dying Bill  2017: Bill defeated. | As per Oregon USA: a competent adult NSW resident with a terminal illness that will kill the patient within six months may request in writing, a prescription for a lethal dose of medication for the purpose of ending the patient's life. | Bill defeated |
| Western Australia. | Bill introduced Parliament in 2019. | Aged **18 or over** and be **terminally ill** with a condition that is causing **intolerable suffering,** and is likely to cause **death within six months or 12 months for a neurodegenerative condition** | Bill awaiting first hearing. |
| Queensland | Premier launched enquiry November 2018. |  |  |
| New Zealand | End of Life Choice Bill  (in Parliament) | As per Victoria act. | Bill awaiting third hearing: in committee stage. |
